# Supplementary material for: Predictors of Postviral Symptoms Following Epstein-Barr Virus-Associated Infectious Mononucleosis in Young People – Data from the IMMUC Study
Source: bioRxiv or medRxiv preprint supplement (doi:10.1101/2024.05.17.24307333), 2024-05-17
Supplement: Supplementary file [file media-1.pdf]

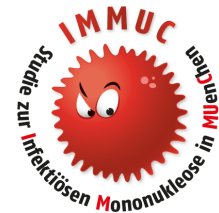

IMMUC\_Medical history \_\_\_\_\_

**Patient ID:** EP- ... .. - ... .. / ... .. - ... .. - ...

*If applicable add/ underline terms in brackets*

**Congenital immunodeficiency / warning signs**

- no  yes Known congenital immunodeficiency (.....)
- no  yes Known failure to thrive
- no  yes  $\geq 8$  minor infections per year (common cold, tonsillitis, pharyngitis, otitis media, lymph node abscess on the neck, bronchitis, gastroenteritis)
- no  yes Major infection (pneumonia, sepsis, meningitis, septic arthritis, osteomyelitis, empyema, deep abscess)
- no  yes Unusual pathogens (mycosis, pseudomonas, others: .....
- no  yes Chronically-recurring infections (.....)
- no  yes Localization (.....)
- no  yes Residuals of infections (bronchiectasis, scars, loss of nails, others: .....
- no  yes Granuloma („sarcoid-like lesions“) (skin, bowels, other localization: .....
- no  yes Autoimmune disease (thyroiditis, diabetes mellitus type I, rheumatoid arthritis, multiple sclerosis, systemic lupus erythematosus, immune cytopenia, others: .....
- no  yes Recurrent fever (unclear genesis) (frequency: .....
- no  yes Unclear skin rash / eczema / neurodermatitis
- no  yes Lymph proliferation (chron. lymphocytosis, chronic/ recurrent lymph node swelling, chron. splenomegaly)
- no  yes Chronic bowel inflammation (specific diagnosis: .....

**Other pre-existing illnesses**

- no  yes Viral infection with known pathogen (influenza/ Influenza virus, herpes labialis/ herpes simplex virus [HSV], chickenpox/ herpes zoster/varicella-zoster virus [VZV], measles/ measles virus, three-day fever/ pityriasis rosea/ human herpesvirus 6 [HHV6]/ HHV7), others: .....
- no  yes Bacterial infection with known pathogen or antibiotic therapy (scarlet fever/ group A streptococcus [GAS]), others: .....
- no  yes Febrile illness during the last 6 months, number of: .....
- no  yes Infectious, non-febrile illness during the last 6 months, number of .....
- no  yes Allergies (pollen/ grass, foods, animal hair, insect venom, medicine, others: .....
- no  yes Oncological disease (leukemia/ lymphoma, others: .....
- no  yes Transplantation (.....)
- no  yes Developmental delay (motoric, mental:.....)
- no  yes Transfusion/blood products (which/reason: .....
- no  yes Other pre-existing illnesses  dialysis  migraine  others (which: .....

**Medication during the last 6 months (prior to onset of IM symptoms)**

- no  yes  Vitamine D
- no  yes  Antibiotics (which: .....
- no  yes  Immunosuppressants (which: .....
- no  yes  Analgesics (which: .....
- no  yes  Steroids (which: .....
- no  yes  Others (which: .....

**Vaccination**

- no  yes  Standard (STIKO<sup>1</sup> recommendation)  standard (incomplete)  VZV (chickenpox)
- no  yes  During the last 6 months (STIKO, influenza, tick-borne encephalitis [TBE], human papillomavirus [HPV], yellow fever, others.....)
- no  yes  Additional vaccinations (influenza, TBE, HPV, yellow fever, others: .....

**Exposure to farm animals and/or pets**

- no  yes Farm animals
- no  yes Pets (which: .....

<sup>1</sup> "Ständige Impfkommission" – the standing committee on vaccination at the Robert Koch Institute (RKI), a department of the German Federal Health Agency

**Patient ID:** EP- ... ..

**Travel outside of Germany during the last 6 months**

- no     yes     Europe/ Middle East:.....     Far East:.....  
 other:.....

**Family history**

- no     yes    Consanguineous parents (if yes, degree: .....)
- no     yes    (Half)siblings total (how many:.....)
- no     yes    (Half)siblings in same household (how many: .....)
- no     yes    Persons in same household (how many: ..... <25 years : .....)
- no     yes    Infectious Mononucleosis (how many:.....)
- no     yes    Congenital immunodeficiency (which/ who:.....)
- no     yes    Transplantation (which/ who:.....)
- no     yes    Oncological disease (which/who/age (above/ below 50 years) .....  
.....  
.....)
- no     yes    Autoimmune disease (thyroiditis, diabetes mellitus type I, rheumatoid arthritis, multiple sclerosis, systemic lupus erythematosus, immune cytopenia, others: .....  
.....)
- no     yes    Allergies (which/ who: .....  
.....)
- no     yes    Other pre-existing illnesses (which/ who: .....  
.....)
