# Supplementary material for: Predictors of Postviral Symptoms Following Epstein-Barr Virus-Associated Infectious Mononucleosis in Young People – Data from the IMMUC Study
Source: bioRxiv or medRxiv preprint supplement (doi:10.1101/2024.05.17.24307333), 2024-05-17
Supplement: Supplementary file [file media-2.pdf]

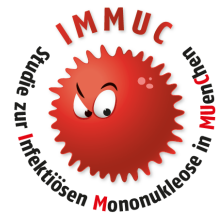

**IMMUC Score – Symptom and Severity Score**

|                                                            |                                                                                               |                    |
|------------------------------------------------------------|-----------------------------------------------------------------------------------------------|--------------------|
| <b>Patient ID:</b> EP- ..... - ..... / ..... - ..... - ... |                                                                                               | <b>IMMUC Score</b> |
| <b>Total Complexity</b>                                    | <i>Number of clinical and laboratory symptoms</i>                                             |                    |
| <b>Clinical Complexity</b>                                 | <i>Number of clinical symptoms</i>                                                            |                    |
| <b>Laboratory Complexity</b>                               | <i>Number of laboratory symptoms</i>                                                          |                    |
| <b>Severity of all symptoms</b>                            | <i>Maximum severity score of clinical and laboratory symptoms;<br/>(s5 – death due to IM)</i> |                    |
| <b>Severity of Clinical Symptoms</b>                       | <i>Maximum severity score of clinical symptoms</i>                                            |                    |
| <b>Severity of laboratory Symptoms</b>                     | <i>Maximum severity score of laboratory symptoms</i>                                          |                    |

**Clinical Symptoms**

| <b>Symptom</b>                                             | <b>Severity</b> |
|------------------------------------------------------------|-----------------|
| <b>1. Fever</b>                                            |                 |
| No                                                         | <b>s0</b>       |
| ≥ 38.5 – 39.4°C                                            | <b>s1</b>       |
| ≥ 39.5°C                                                   | <b>s2</b>       |
| Antibiotics                                                |                 |
| No information                                             | <b>sx</b>       |
| <b>2. Fatigue</b>                                          |                 |
| No                                                         | <b>s0</b>       |
| Can walk alone                                             | <b>s1</b>       |
| Assisted walking                                           | <b>s2</b>       |
| T6: Reduced education/work/ club sports                    |                 |
| Can not walk                                               | <b>s3</b>       |
| No information                                             | <b>sx</b>       |
| <b>3. Lymphadenopathy</b>                                  |                 |
| No                                                         | <b>s0</b>       |
| Enlarged nodes                                             | <b>s1</b>       |
| Painful nodes                                              |                 |
| Movement locally impaired                                  | <b>s2</b>       |
| Antibiotics                                                |                 |
| Computed tomography (CT)/ Magnetic resonance imaging (MRI) | <b>s3</b>       |
| Biopsy (Bone marrow biopsy [BMB]/ Lymph node biopsy [LNB]) | <b>s4</b>       |
| No information                                             | <b>sx</b>       |
| <b>4. Tonsillopharyngitis</b>                              |                 |
| No                                                         | <b>s0</b>       |
| Sore throat, pain killers                                  | <b>s1</b>       |
| Snoring/upper respiratory tract obstruction                |                 |
| Tonsillitis                                                |                 |
| Antibiotics                                                | <b>s2</b>       |
| Steroids                                                   | <b>s3</b>       |
| Oxygen supply                                              |                 |
| Tonsillotomy                                               | <b>s4</b>       |
| No information                                             | <b>sx</b>       |
| <b>5. Splenomegaly</b>                                     |                 |
| No                                                         | <b>s0</b>       |

IMMUC Score \_\_\_\_\_

|                                                      |    |
|------------------------------------------------------|----|
| Sonography >100-119%, not palpable                   | s1 |
| Palpable                                             |    |
| Sonography >120%                                     | s2 |
| Rupture                                              | s4 |
| Surgery                                              |    |
| No information                                       | sx |
| <b>6. Facial edema</b>                               |    |
| No                                                   | s0 |
| No visual impairment                                 | s1 |
| Partial visual impairment                            |    |
| Antihistamines                                       | s2 |
| Antibiotics due to lid phlegmon                      |    |
| Complete visual impairment                           |    |
| Steroids                                             | s3 |
| No information                                       |    |
| <b>7. Exanthema</b>                                  |    |
| No                                                   | s0 |
| Maculopapulous w/o Aminopenicillin                   | s1 |
| Maculopapulous post Aminopenicillin                  |    |
| Aphthae                                              |    |
| Itching a/o pain                                     | s2 |
| Antihistamines                                       |    |
| Local steroids                                       |    |
| Erythema nodosum                                     |    |
| Bullae                                               | s3 |
| Steroids                                             |    |
| Biopsy                                               |    |
| Necrosis                                             | s4 |
| No information                                       | sx |
| <b>08. Bleeding, Treatment of bleeding or anemia</b> |    |
| No                                                   | s0 |
| Nose bleeding (≤10min)                               | s1 |
| Hematoma (≤10cm)                                     |    |
| Petechiae                                            |    |
| Hematoma (>10cm)                                     | s2 |
| Cyclopropric acid as anticoagulans                   |    |
| nose bleeding (>10min a/o >3x/d)                     | s3 |
| Oral blood bullae                                    |    |
| Steroids                                             |    |
| Evans syndrome                                       | s4 |
| Organ bleeding                                       |    |
| Rituximab                                            |    |
| Transfusion                                          |    |
| Plasmapheresis                                       |    |
| No information                                       | sx |
| <b>09. Other airways</b>                             |    |
| No                                                   | s0 |
| Otitis                                               | s1 |
| Rhinitis                                             |    |
| Hoarseness                                           |    |
| Cough                                                |    |
| Stress-related mild dyspnoe                          |    |
| Parotitis                                            |    |
| Swollen a/o tender tongue                            |    |
| Antibiotics                                          |    |
| Local steroids                                       | s2 |
| Oxygen supply                                        |    |
| Steroids                                             | s3 |
| X-ray thorax                                         |    |
| Pneumonia                                            |    |
| CT thorax                                            | s4 |
| Paracentesis/ ear ventilation tube/ adenoidectomy    |    |
| Thoracic drainage                                    |    |
| Mechanical ventilation                               |    |
| No information                                       |    |
| No information                                       | sx |

IMMUC Score \_\_\_\_\_

|                                                                                                     |           |
|-----------------------------------------------------------------------------------------------------|-----------|
| <b>10. Other gastrointestinal</b>                                                                   |           |
| No                                                                                                  | <b>s0</b> |
| Abdominal pain                                                                                      | <b>s1</b> |
| Nausea, vomiting                                                                                    |           |
| Watery diarrhea                                                                                     | <b>s2</b> |
| Melaena a/o Hematemesis                                                                             |           |
| Antiemetics                                                                                         |           |
| Weight loss >10%, possibly not only Epstein-Barr virus (EBV)                                        |           |
| Weight loss >10%                                                                                    | <b>s3</b> |
| Acute abdomen, pancreatitis, appendicitis, ileus                                                    |           |
| Abdominal X-ray, CT/MRI                                                                             |           |
| Antibiotics                                                                                         |           |
| Endoscopy                                                                                           | <b>s4</b> |
| Surgery                                                                                             |           |
| No information                                                                                      | <b>sx</b> |
| <b>11. Urogenital</b>                                                                               |           |
| No                                                                                                  | <b>s0</b> |
| Dysuria                                                                                             | <b>s1</b> |
| Genital ulcer                                                                                       | <b>s2</b> |
| Gross hematuria                                                                                     |           |
| Antibiotics                                                                                         |           |
| Nephrotic syndrome                                                                                  | <b>s3</b> |
| Nephritis                                                                                           |           |
| Nephrological drug treatment                                                                        |           |
| Dialysis                                                                                            | <b>s4</b> |
| Renal biopsy                                                                                        |           |
| No information                                                                                      | <b>sx</b> |
| <b>12. Neurological</b>                                                                             |           |
| No                                                                                                  | <b>s0</b> |
| Headache                                                                                            | <b>s1</b> |
| Meningism                                                                                           | <b>s2</b> |
| Lumbar puncture                                                                                     |           |
| Antibiotics                                                                                         |           |
| Seizure                                                                                             | <b>s3</b> |
| Documented meningitis                                                                               |           |
| Neurological drug 1x                                                                                |           |
| CT/MRI                                                                                              |           |
| Electroencephalogram (EEG), nerve conduction velocity (NCV),<br>Electrophysiology (EP) <sup>i</sup> | <b>s4</b> |
| Neurological drug > 1x                                                                              |           |
| Encephalitis                                                                                        |           |
| Neuritis                                                                                            |           |
| No information                                                                                      | <b>sx</b> |
| <b>13. Musculoskeletal</b>                                                                          |           |
| No                                                                                                  | <b>s0</b> |
| Body aches                                                                                          | <b>s1</b> |
| Painkillers for body aches                                                                          | <b>s2</b> |
| Joint swelling                                                                                      |           |
| Joint ultrasound                                                                                    | <b>s3</b> |
| Pain-related immobilisation                                                                         |           |
| No information                                                                                      |           |
| No information                                                                                      | <b>sx</b> |
| <b>14. Imminent or treatment for hemophagocytic lymphohistiocytosis (HLH)</b>                       |           |
| No                                                                                                  | <b>s0</b> |
| 4 of 8 criteria fulfilled                                                                           | <b>s3</b> |
| Steroids                                                                                            |           |
| Other HLH drug(s)                                                                                   | <b>s4</b> |
| Stem cell Tx                                                                                        |           |
| No information                                                                                      | <b>sx</b> |
| <b>15. Hospitalization</b>                                                                          |           |
| No                                                                                                  | <b>s0</b> |
| Normal ward < 8d                                                                                    | <b>s2</b> |
| Normal ward ≥8d a/o intermediate care unit                                                          | <b>s3</b> |
| Intensive care unit (ICU)                                                                           | <b>s4</b> |
| No information                                                                                      | <b>sx</b> |

IMMUC Score \_\_\_\_\_

## Laboratory Symptoms

|                                                                                          |    |
|------------------------------------------------------------------------------------------|----|
| <b>16. Lymphocytosis</b>                                                                 |    |
| No                                                                                       | s0 |
| ≥ 1,5x normal (%)                                                                        | s1 |
| No information                                                                           | sx |
| <b>17. Neutropenia</b>                                                                   |    |
| No                                                                                       | s0 |
| 1.0 - 1.49 G/l                                                                           | s1 |
| 0.5 - 0.99 G/l                                                                           | s2 |
| < 0.5 G/l                                                                                | s3 |
| No information                                                                           | sx |
| <b>18. Anemia</b>                                                                        |    |
| No                                                                                       | s0 |
| 9.0- 10.0 g/dl                                                                           | s1 |
| 7.0 – 8.9 g/dl                                                                           | s2 |
| 5.0 – 6.9 g/dl                                                                           | s3 |
| < 5 g/dl                                                                                 | s4 |
| Reticulocyte production index >3                                                         |    |
| Reticulocyte production index <2                                                         |    |
| No information                                                                           | sx |
| <b>19. Thrombocytopenia</b>                                                              |    |
| No                                                                                       | s0 |
| 50 – 149 G/l                                                                             | s1 |
| 30 – 49 G/l                                                                              | s2 |
| 10 – 29 G/l                                                                              | s3 |
| < 10 G/l                                                                                 | s4 |
| No information                                                                           | sx |
| <b>20. Hyperferritinemia</b>                                                             |    |
| No                                                                                       | s0 |
| ≥ 100 ug/l > norm                                                                        | s1 |
| ≥ 500 – 999 ug/l                                                                         | s2 |
| ≥ 1000- 4999 ug/l                                                                        | s3 |
| ≥ 5000 ug/l                                                                              | s4 |
| No information                                                                           | sx |
| <b>21. Hepatitis, Cholangitis</b>                                                        |    |
| No                                                                                       | s0 |
| Alanine aminotransferase (ALAT) u/o aspartate aminotransferase (ASAT) 2,0 - 9,9 x normal | s1 |
| ALAT u/o ASAT 10,0 - 19,9 x normal                                                       | s2 |
| ALAT u/o ASAT ≥20,0 x normal                                                             | s3 |
| Ammonia ↑, Cholinesterase↓ u/o Quick value < 50%                                         | s4 |
| No information                                                                           | sx |
| <b>22. Nephropathy</b>                                                                   |    |
| No                                                                                       | s0 |
| Creatinine ↑ ≤ 0,2 mg/dl over norm + elevated Cystatin C                                 | s1 |
| Creatinine ↑ > 0,2 mg/dl over norm, but < 1,5 mg/dl (<10a) + elevated Cystatin C         | s2 |
| Creatinine ↑ ≥ 0,2 mg/dl over norm, but < 2,0 mg/dl (≥10a) + elevated Cystatin C         |    |
| Creatinine ↑ ≥ 1,5 mg/dl (<10a) + elevated Cystatin C                                    | s3 |
| Creatinine a ≥ 2,0 mg/dl (≥10a) + elevated Cystatin C                                    |    |
| No information                                                                           | sx |
| <b>23. C-reactive protein (CRP) elevation</b>                                            |    |
| No                                                                                       | s0 |
| > 10 – 99 mg/l                                                                           | s1 |
| 100 – 199 mg/l                                                                           | s2 |
| Antibiotics                                                                              |    |
| ≥ 200 mg/l                                                                               | s3 |
| No information                                                                           | sx |
